# Supplementary material for: Direct growth of ZnO crystals on various Cu substrates by Cu-catalyzed chemical bath deposition
Source: Royal Society of Chemistry journal article supplement (doi:10.1039/c9ce00244h), 2019-01-01
Supplement: c9ce00244h1.pdf [file c9ce00244h1.pdf]

Electronic Supplementary Information

**Direct growth of ZnO crystals on various Cu substrates by Cu-catalyzed chemical bath deposition**

Tsutomu Shinagawa,<sup>a,c\*</sup> Hisaya Takahashi,<sup>b</sup> and Masanobu Izaki<sup>c</sup>

<sup>a</sup> *Electronic Materials Research Division, Osaka Research Institute of Industrial Science and Technology, Osaka 536-8553, Japan.*

*\*E-mail: tshina@omtri.or.jp*

<sup>b</sup> *Mesh Corporation, Osaka 530-0047, Japan.*

<sup>c</sup> *Graduate School of Engineering, Toyohashi University of Technology, Toyohashi, Aichi 441-8580, Japan*

## Experimental

**Chemical bath deposition of ZnO.** All aqueous solutions were prepared using reagent-grade chemicals and deionized (DI) water ( $>10\text{ M}\Omega\text{ cm}$ ) purified by a Millipore Elix Advantage 5 system. As a pure Cu substrate, (i) a polycrystalline Cu plate for Hull cell tests ( $67 \times 100 \times 0.3\text{ mm}$ , surface roughness ( $R_a$ ) =  $\sim 20\text{ nm}$ , Yamamoto-MS Co., Ltd.), (ii) a polished single-crystal Cu(111) plate ( $10 \times 10 \times 0.5\text{ mm}$ ,  $R_a < 3\text{ nm}$ , MTI Co.) and (iii) a Cu mesh ( $\phi 0.11 \times 100 \times 100\text{ mm}$ , 100 mesh, Nilaco Co.) were used. First, substrates (i) and (iii) were cut to a size of  $15\text{--}30 \times 50\text{ mm}$  as required. Prior to the deposition, these Cu substrates were cleaned by immersion in an alkaline degreasing solution (Ace Clean, Okuno Chemical Industries Co., Ltd.) at  $50\text{ }^\circ\text{C}$  for 5 min and then rinsed with DI water. ZnO was deposited by the immersion of the Cu substrate in an aqueous solution containing  $5.0\text{--}160\text{ mM Zn(NO}_3)_2 \cdot 6\text{H}_2\text{O}$  ( $\geq 99\%$ , Nacalai Tesque, Inc.) and  $3\text{ mM}$  dimethylamine borane (DMAB,  $\geq 97\%$ , Wako Pure Chemical Industries, Ltd.) at  $80\text{ }^\circ\text{C}$  for  $0.5\text{--}1\text{ h}$  without agitation (the pH of the solution was  $\sim 5.8$  at  $25\text{ }^\circ\text{C}$ ). The deposits were rinsed with DI water and dried under ambient atmosphere.

**Characterization of ZnO.** The morphology and crystal structure of ZnO were examined by field-emission scanning electron microscopy (FESEM, JEOL JSM6700F) and X-ray diffraction using Cu  $K\alpha$  radiation (XRD, Rigaku SmartLab). Photoluminescence (PL) spectra and Raman spectra were recorded on a microscopic laser Raman (PL) spectrometer (HORIBA LabRAM HR Evolution) using laser light with a wavelength of  $325\text{ nm}$  and  $532\text{ nm}$ , respectively.

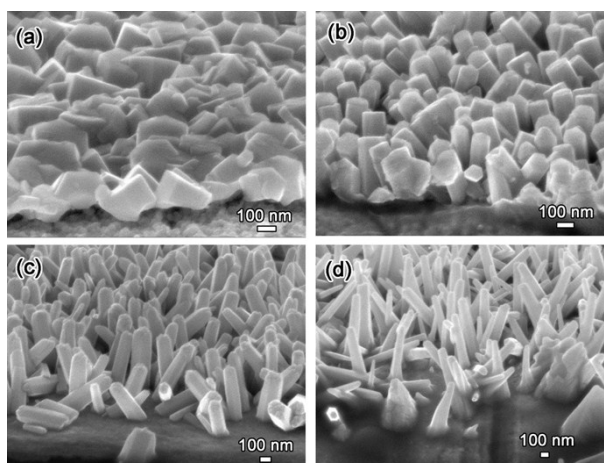

**Figure S1.** Tilt-view FESEM images of ZnO deposited on polycrystalline Cu plates by immersing in a  $\text{Zn}(\text{NO}_3)_2$ -3 mM DMAB aqueous solution at 80 °C for 30 min at different  $\text{Zn}(\text{NO}_3)_2$  concentrations: (a) 160, (b) 80, (c) 20 and (d) 5.0 mM.

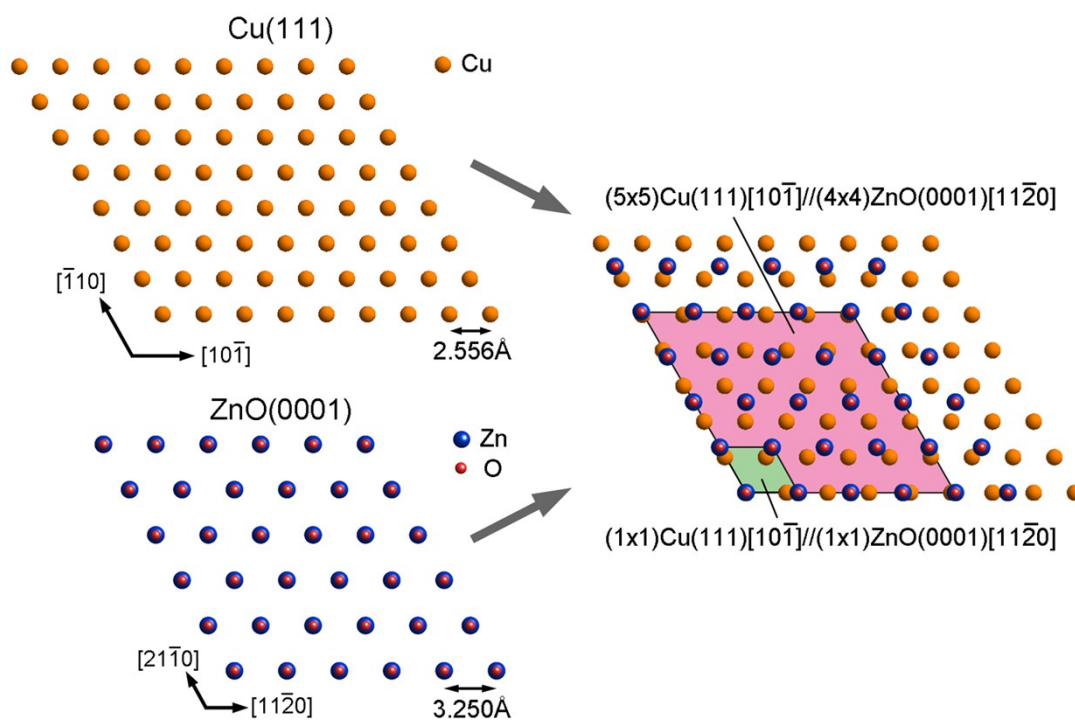

**Figure S2.** Schematic of the atomic arrangements for the Cu(111), ZnO(0001) planes and their overlap.

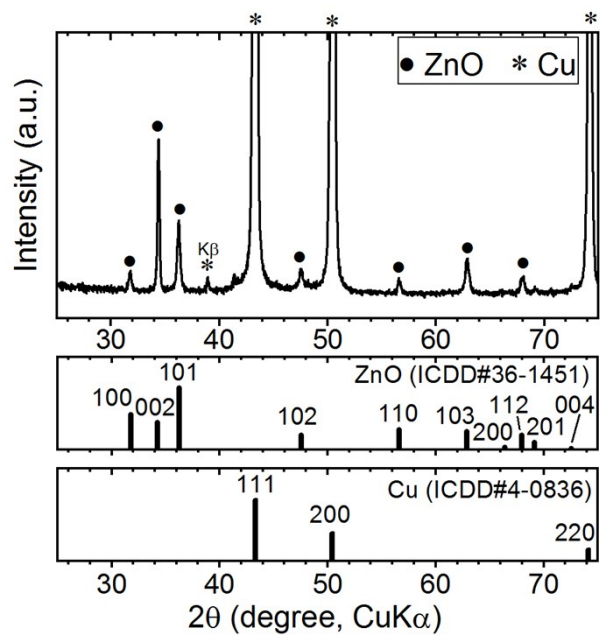

**Figure S3.** XRD pattern of ZnO obtained by immersing a Cu mesh in 5.0 mM  $\text{Zn}(\text{NO}_3)_2$ –3.0 mM DMAB aqueous solution.
